# Supplementary material
Source: PubMed Central journal article supplement (PMC6983375)
Supplement: pnas.1918268117.sapp.pdf [file pnas.1918268117.sapp.pdf]

# PNAS

[www.pnas.org](http://www.pnas.org)

Supplementary Information for

**Global shape of Toll activation is determined by *wntD* enhancer properties**

Neta Rahimi<sup>1\*</sup>, Shari Carmon<sup>1\*</sup>, Inna Averbukh<sup>1\*</sup>, Farzaneh Khajouei<sup>2</sup>, Saurabh Sinha<sup>2</sup>, Eyal D. Schejter<sup>1</sup>, Naama Barkai<sup>1</sup> and Ben-Zion Shilo<sup>1&</sup>

Ben-Zion Shilo  
Email: [benny.shilo@weizmann.ac.il](mailto:benny.shilo@weizmann.ac.il)

**This PDF file includes:**

Figures S1

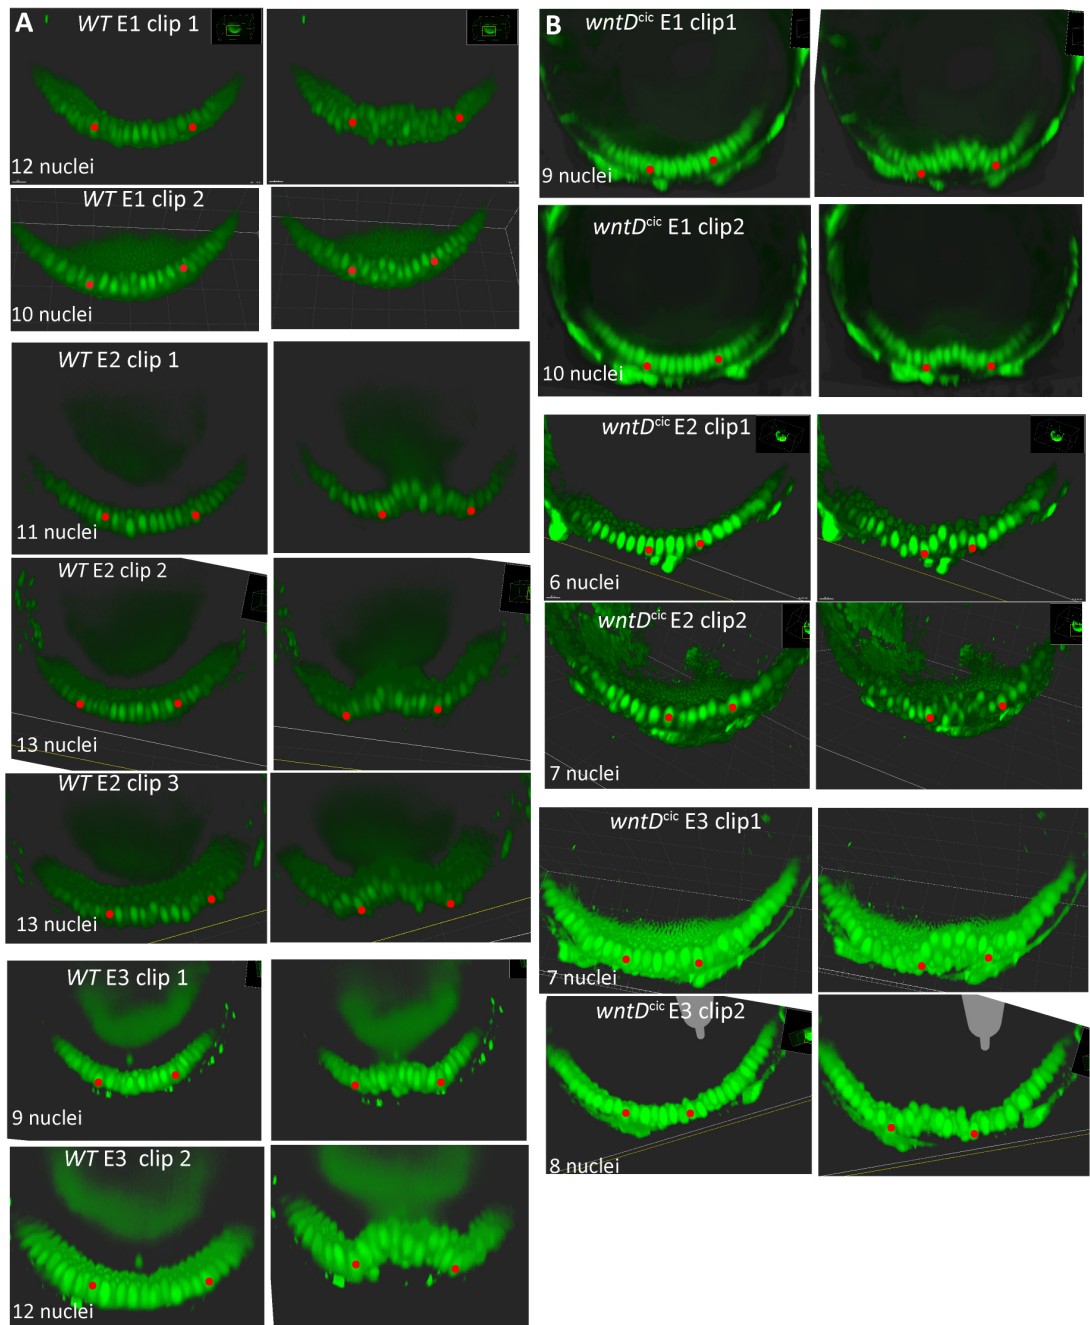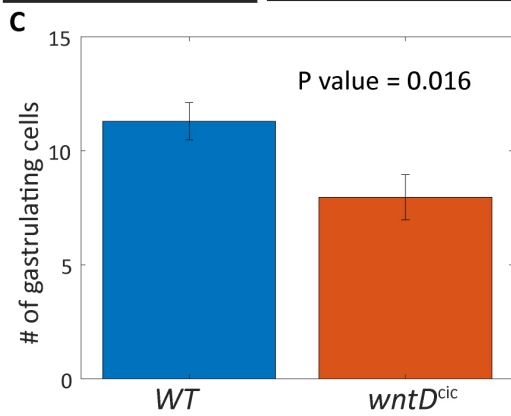

**Fig. S1.**

**Expanded *wntD* expression leads to reduction of cells undergoing ventral furrowing.** (A,B) Analysis and comparison of the number of cells undergoing ventral furrowing, monitored by live imaging of Dorsal-GFP (green), which localizes to ventral nuclei, in *wt* and *wntD<sup>cic/+</sup>* embryos. Nuclei at the lateral edges of the ventral furrow (red) served as guideposts for the extent of the gastrulating domain. Section at several planes along the anterior-posterior axis are shown for each embryo. (C) The number of cells undergoing ventral furrowing for each embryo is the average of these sections. The average number of cells for three embryos of each genotype shows a smaller number of such cells, that is statistically significant, for the *wntD<sup>cic/+</sup>* embryos.
